# Supplementary material for: Organic Nitrogen Forms in Soils Treated with Cattle Manure
Source: MDPI journal article supplement (doi:10.3390/nitrogen5010007), 2024-02-01
Supplement: s1 [file s1]

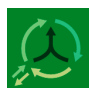

Table S1. Correlation coefficients between pH, organic carbon content and the forms and fractions of N in clayey soil (LV).

|                     | N-HA                | N-AS                | N-AA                | N-HT               | N-HU               | N-AI                | Total N             | N-DSD               | SOC                 | pH                  |
|---------------------|---------------------|---------------------|---------------------|--------------------|--------------------|---------------------|---------------------|---------------------|---------------------|---------------------|
| N-AS <sup>(1)</sup> | 0.19 <sup>ns</sup>  | 1                   |                     |                    |                    |                     |                     |                     |                     |                     |
| N-AA                | 0.43*               | 0.00 <sup>ns</sup>  | 1                   |                    |                    |                     |                     |                     |                     |                     |
| N-HT                | 0.56*               | 0.71*               | 0.27 <sup>ns</sup>  | 1                  |                    |                     |                     |                     |                     |                     |
| N-HU                | 0.32 <sup>ns</sup>  | 0.64*               | −0.16 <sup>ns</sup> | 0.89*              | 1                  |                     |                     |                     |                     |                     |
| N-AI                | −0.04 <sup>ns</sup> | −0.06 <sup>ns</sup> | 0.17 <sup>ns</sup>  | 0.26 <sup>ns</sup> | 0.27 <sup>ns</sup> | 1                   |                     |                     |                     |                     |
| Total N             | 0.58*               | 0.42*               | 0.14 <sup>ns</sup>  | 0.66*              | 0.58*              | 0.29 <sup>ns</sup>  | 1                   |                     |                     |                     |
| N-DSD               | 0.21 <sup>ns</sup>  | 0.33 <sup>ns</sup>  | −0.25 <sup>ns</sup> | 0.58*              | 0.73*              | 0.45*               | 0.51*               | 1                   |                     |                     |
| SOC                 | 0.63*               | 0.59*               | 0.23 <sup>ns</sup>  | 0.83*              | 0.71*              | 0.33 <sup>ns</sup>  | 0.82*               | 0.57*               | 1                   |                     |
| pH                  | 0.49*               | 0.25 <sup>ns</sup>  | 0.10 <sup>ns</sup>  | 0.60*              | 0.58*              | 0.35*               | 0.63*               | 0.54*               | 0.74*               | 1                   |
| N-min               | 0.03 <sup>ns</sup>  | 0.38*               | 0.22 <sup>ns</sup>  | 0.18 <sup>ns</sup> | 0.05 <sup>ns</sup> | −0.12 <sup>ns</sup> | −0.08 <sup>ns</sup> | −0.29 <sup>ns</sup> | −0.06 <sup>ns</sup> | −0.26 <sup>ns</sup> |

<sup>(1)</sup> N-AS: amino sugar fraction; N-HA: hydrolysable ammonium; N-AA: N amino acids; N-HT: total hydrolysable; N-HU: unidentified hydrolysable; N-AI: insoluble in acid; Total N: total soil N; N-DSD: N potentially available through the direct steam distillation method; SOC: soil organic carbon; pH: soil pH measured in CaCl<sub>2</sub> solution 0.01 M L<sup>−1</sup>; N-min: Soil mineral N.

Table S2. Correlation coefficients between pH, organic carbon content and the forms and fractions of N in sandy soil (PVA).

|                     | N-HA               | N-AS                | N-AA               | N-HT                | N-HU                | N-AI               | Total N            | N-DSD | SOC   | pH                 |
|---------------------|--------------------|---------------------|--------------------|---------------------|---------------------|--------------------|--------------------|-------|-------|--------------------|
| N-AS <sup>(1)</sup> | −0.81*             | 1                   |                    |                     |                     |                    |                    |       |       |                    |
| N-AA                | 0.38*              | −0.24 <sup>ns</sup> | 1                  |                     |                     |                    |                    |       |       |                    |
| N-HT                | 0.53*              | −0.29 <sup>ns</sup> | 0.36*              | 1                   |                     |                    |                    |       |       |                    |
| N-HU                | 0.42*              | −0.32 <sup>ns</sup> | 0.19 <sup>ns</sup> | 0.96*               | 1                   |                    |                    |       |       |                    |
| N-AI                | 0.34 <sup>ns</sup> | −0.18 <sup>ns</sup> | 0.32 <sup>ns</sup> | −0.15 <sup>ns</sup> | −0.30 <sup>ns</sup> | 1                  |                    |       |       |                    |
| Total N             | 0.42*              | −0.33 <sup>ns</sup> | 0.39*              | 0.20 <sup>ns</sup>  | 0.12 <sup>ns</sup>  | 0.11 <sup>ns</sup> | 1                  |       |       |                    |
| N-DSD               | 0.76*              | −0.54*              | 0.34 <sup>ns</sup> | 0.51*               | 0.40*               | 0.43*              | 0.37*              | 1     |       |                    |
| SOC                 | 0.75*              | −0.58*              | 0.42*              | 0.61*               | 0.52*               | 0.17 <sup>ns</sup> | 0.41*              | 0.62* | 1     |                    |
| pH                  | 0.80*              | −0.65*              | 0.32 <sup>ns</sup> | 0.44*               | 0.35*               | 0.49*              | 0.33 <sup>ns</sup> | 0.79* | 0.60* | 1                  |
| N-min               | 0.47*              | −0.15 <sup>ns</sup> | 0.46*              | 0.41*               | 0.24 <sup>ns</sup>  | 0.15 <sup>ns</sup> | 0.28 <sup>ns</sup> | 0.39* | 0.51* | 0.17 <sup>ns</sup> |

<sup>(1)</sup> N-AS: amino sugar fraction; N-HA: hydrolysable ammonium; N-AA: N amino acids; N-HT: total hydrolysable; N-HU: unidentified hydrolysable; N-AI: insoluble in acid; Total N: total soil N; N-DSD: N potentially available through the direct steam distillation method; SOC: soil organic carbon; pH: soil pH measured in CaCl<sub>2</sub> solution 0.01 M L<sup>−1</sup>; N-min: Soil mineral N.
